# Supplementary material for: The Effects of Early Life Stress, Postnatal Diet Modulation, and Long-Term Western-Style Diet on Later-Life Metabolic and Cognitive Outcomes
Source: MDPI journal article supplement (doi:10.3390/nu12020570), 2020-02-22
Supplement: s1 [file s1]

Supplementary Materials:

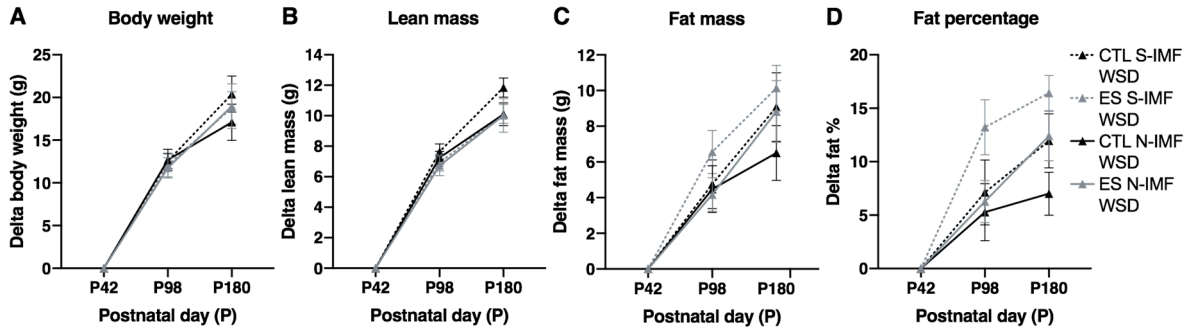

**Supplementary figure S1: DEXA body composition development during WSD challenge.** ES and N-IMF do not alter WSD-induced increases in delta BW (A), lean mass (B), fat mass (C), or fat percentage (D). Statistical analyses were performed using three-way repeated measures ANOVA. Absolute data points P42 represented as mean±SEM: BW: CTL S-IMF WSD 22.37±0.83; ES S-IMF WSD 22.45±0.31; CTL N-IMF WSD 23.35±0.66; ES N-IMF WSD 23.08±0.67; lean mass: CTL S-IMF WSD 17.58±0.82; ES S-IMF WSD 17.08±0.33; CTL N-IMF WSD 18.05±0.63; ES N-IMF WSD 18.20±0.54; fat mass: CTL S-IMF WSD 3.90±0.29; ES S-IMF WSD 3.32±0.22; CTL N-IMF WSD 4.90±0.22; ES N-IMF WSD 4.25±0.10; fat percentage: CTL S-IMF WSD 18.20±1.30; ES S-IMF WSD 16.38±0.43; CTL N-IMF WSD 21.38±1.06; ES N-IMF WSD 18.93±0.27.
